# Supplementary material
Source: publisher figshare collection journal article supplement (https://asha.figshare.com/articles/dataset/_/28678565)
Supplement: Supplementary file 1 [file 1]

**Supplemental Material S2.** Means and standard deviations of D-REF for START students.

|                        | Pre-test |       | Post-test |       | P<br>value | Hedge's<br>Correction-<br>Effect Size |
|------------------------|----------|-------|-----------|-------|------------|---------------------------------------|
|                        | Mean     | SD    | Mean      | SD    |            |                                       |
| D-REF Total EF         | 182.59   | 32.18 | 176.88    | 36.13 | .27        | .27                                   |
| D-REF<br>Behavioral_EF | 32.71    | 10.44 | 31.35     | 9.810 | .36        | .22                                   |
| D-REF<br>Emotional_EF  | 22.06    | 6.437 | 20.94     | 5.68  | .37        | .22                                   |
| D-REF<br>Cognitive_EF  | 55.18    | 13.84 | 53.29     | 17.77 | .40        | .20                                   |

Note: scores on DREF are raw scores due to 5 students being under the age of 19.0; therefore, T-scores could not be obtained. D-REF = Delis Rating of Executive Functions- Adult Self-Rating Form. EF= Executive Functioning.
